# Supplementary material
Source: HighWire-hosted journal article supplement (https://www.cmajopen.ca/highwire/filestream/81295/field_highwire_adjunct_files/1/2019-0204-2-at.pdf)
Supplement: 2019-0204-2-at.pdf [file 2019-0204-2-at.pdf]

**Appendix 2 (as supplied by the authors): Change in chiropractors' websites with vaccination content from 2016 to 2019**

| Province         | Active as of 2019 |         |          | Inactive or vaccination content removed in 2019 |         |          |
|------------------|-------------------|---------|----------|-------------------------------------------------|---------|----------|
|                  | positive          | neutral | negative | positive                                        | neutral | negative |
| Ontario          | 12                | 8       | 21       | 4                                               | 4       | 21       |
| British Columbia |                   |         |          |                                                 | 2       | 4        |
| Alberta          |                   |         | 1        |                                                 | 1       | 2        |
| Manitoba         |                   |         |          |                                                 | 1       | 2        |
| New Brunswick    |                   | 2       | 1        |                                                 |         |          |
| Newfoundland     |                   |         | 1        |                                                 |         | 1        |
| Nova Scotia      |                   |         | 2        |                                                 |         | 1        |
| Quebec           |                   | 1       |          |                                                 |         | 2        |
| <b>Total</b>     | 12                | 11      | 26       | 4                                               | 8       | 33       |

positive, neutral, and negative = websites that provided positive, neutral or negative information regarding vaccination
